# Supplementary material
Source: Springer Nature journal article supplement (https://www.springermedizin.de/resource/supplementary/12943_2013_1480_MOESM2_ESM.pdf/9553108)
Supplement: MOESM2 [file 9553108]

## Supplementary Figure 2

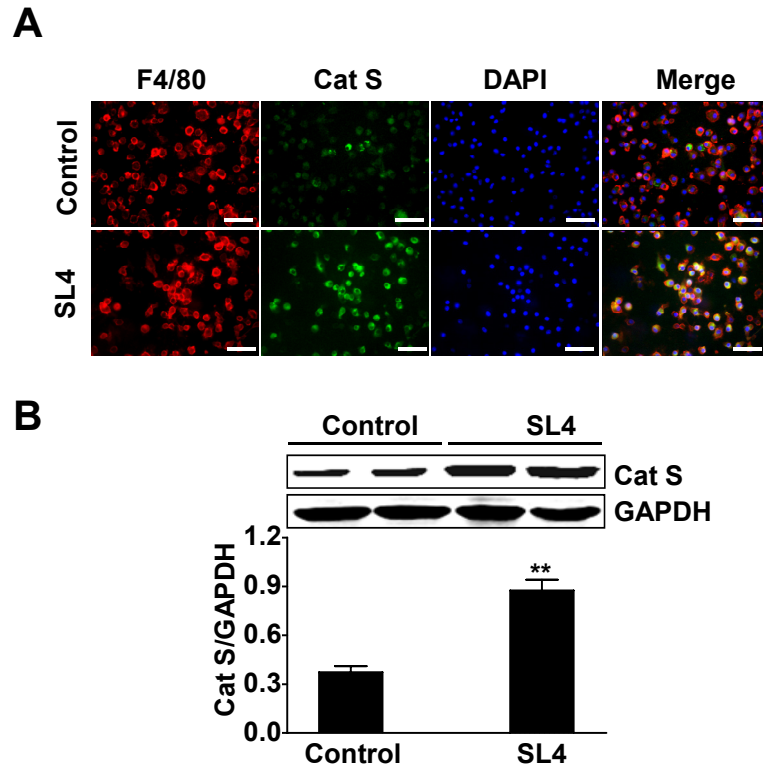

**Supplementary Figure 2. SL4 cells induce Cat S expression in macrophages.** (A) BMDMs were cocultured with SL4 cells for 48 hrs and serum-starved for at least 12 hrs before co-culture. Double immunofluorescence analyses of Cat S expression in BMDMs with or without SL4 cells treatment. BMDMs were stained with anti-F4/80 (red) or anti-Cat S (green) antibody and DAPI (blue; to stain the nuclei). ( $\times 400$  magnification and Scale bars = 50  $\mu\text{m}$ ). Three independent experiments were performed. (B) Western blot analysis of the protein levels of Cat S in BMDMs with or without SL4 cells treatment. GAPDH was used as a loading control. Quantitative analysis of Cat S/GAPDH ratio in BMDMs with or without SL4 cells treatment. Data are mean $\pm$ SEM of 3 independent experiments. \*\*,  $P < 0.01$ .
